# Supplementary material for: Allometric-like scaling of AAV gene therapy for systemic protein delivery
Source: PubMed Central journal article supplement (PMC9641010; doi:10.1016/j.omtm.2022.10.011), 2022-10-21
Supplement: mmc1.pdf [file mmc1.pdf]

OMTM, Volume 27

## **Supplemental information**

### **Allometric-like scaling of AAV gene therapy for systemic protein delivery**

**Alexandra Burr, Patrick Erickson, Raphaela Bento, Kariman Shama, Charles Roth, and Biju Parekkadan**

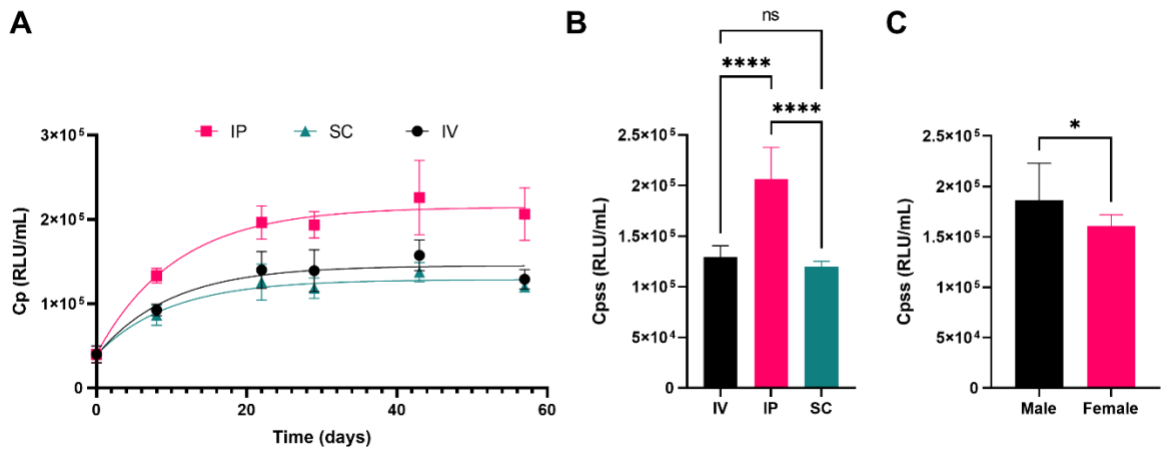

**Figure S1.** GLuc concentration varies with systemic administration route. (A) Concentration of GLuc in the plasma (Cp) over time (RLU/mL) for each administration route: IV = intravenous, IP = intraperitoneal, SC = subcutaneous. Data points show are the mean  $\pm$  SD for replicates (n=8, 4 male/4 female, per group). Solid lines represent curve-fit for an exponential plateau equation to estimate steady-state. (B) Steady-state concentration (RLU/mL) as determined by the curve-fit is shown for each administration route. (C) Comparison of male and female concentrations for all routes of administration. Bars represent mean  $\pm$  SD for replicates. NS = non-significant, \*p<0.05, \*\*\*\* p<0.0001.

### PK model of recombinant GLuc

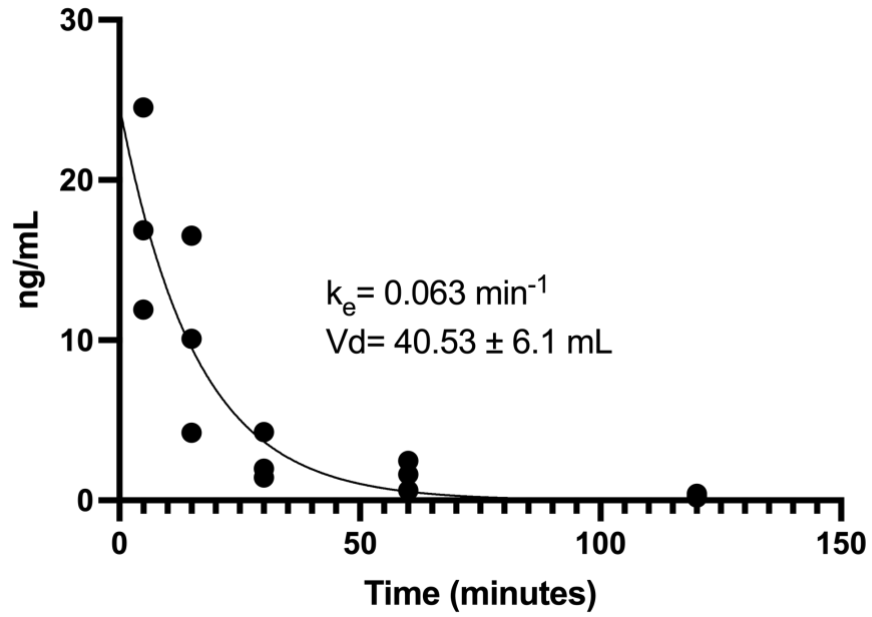

**Figure S2.** A single dose kinetic study with 1ug of the recombinant Gluc protein injected intravenously (n=3 mice/timepoint). Parameters for GLuc were determined by fitting the data to Equation 3 and extracting values of the elimination constant and the volume of distribution.

**Table S1.** Study information for data sets used for literature mining study

| <u>Publication</u>                                                                      | <u>Serotype</u> | <u>Promoter / Transgene</u> | <u># of doses tested</u> | <u># of mice</u> | <u>Route of Administration</u> | <u>Sex, Strain</u>                  | <u>Timepoint for dose-response</u> |
|-----------------------------------------------------------------------------------------|-----------------|-----------------------------|--------------------------|------------------|--------------------------------|-------------------------------------|------------------------------------|
| <a href="#">Nathwani et al, 2009</a>                                                    | scAAV2/8        | LP1-hFIX                    | 4                        | 5-8              | tail vein IV                   | male C57BL/6                        | 57 days                            |
|                                                                                         | scAAV2/9        |                             |                          |                  |                                |                                     |                                    |
|                                                                                         | scAAV2/7        |                             |                          |                  |                                |                                     |                                    |
|                                                                                         | scAAV2/rh10     |                             |                          |                  |                                |                                     |                                    |
| <a href="#">Nathwani et al, 2006</a>                                                    | scAAV2/8        | LP1-hFIXco                  | 4                        | 4                | tail vein IV                   | male C57BL/6                        | 42 days                            |
|                                                                                         | ssAAV2/8        | HCR-hAAT-hFIX               | 6                        |                  |                                |                                     |                                    |
| <a href="#">Davidoff et al, 2005</a>                                                    | ssAAV5/5        | HCR-hAAT-hFIX               | 8                        | 4                | tail vein IV                   | male C57BL/6                        | 116 days                           |
|                                                                                         | ssAAV2/8        |                             | 6                        |                  |                                |                                     |                                    |
| <a href="#">Grimm et al, 2003</a>                                                       | ssAAV2/2        | HCR-hAAT-hFIX               | 6                        | 4-5              | portal vein                    | C57BL/6                             | 42 days                            |
|                                                                                         | ssAAV2/1        |                             | 5                        |                  |                                |                                     |                                    |
|                                                                                         | ssAAV2/6        |                             | 7                        |                  |                                |                                     |                                    |
| <a href="#">Nakai et al, 2002</a>                                                       | ssAAV2/2        | HCR-hAAT-hFIX               | 9                        | 5                | portal vein                    | female C57BL/6 , male C57BL/6 rag-1 | 70 days                            |
| <a href="#">Nakai et al, 2005</a>                                                       | ssAAV2/1        | EF1 $\alpha$ -nlslacZ       | 4                        | 3-6              | portal vein                    | male C57BL/6                        | 42 days                            |
|                                                                                         | ssAAV2/2        |                             |                          |                  |                                |                                     |                                    |
|                                                                                         | ssAAV2/8        |                             |                          |                  |                                |                                     |                                    |
| <b>Abbreviation: Ss: single-stranded genome, sc: self-complementary stranded genome</b> |                 |                             |                          |                  |                                |                                     |                                    |
